# Supplementary material
Source: PubMed Central journal article supplement (PMC8640798)
Supplement: ajcr0011-5374-f7.pdf [file ajcr0011-5374-f7.pdf]

## Anti-tumorigenic effects of ONC206

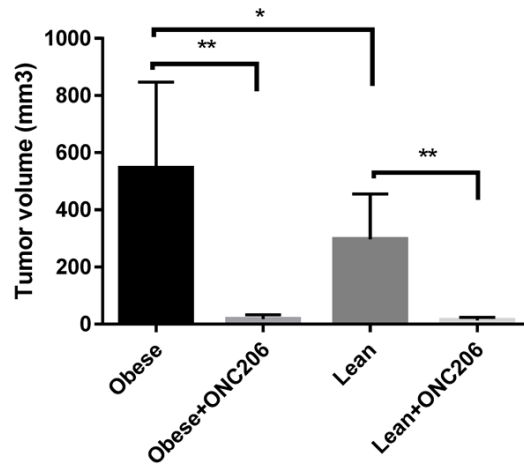

Supplementary Figure 1. ONC206 reduced tumor sizes in LKB1 p53 mouse model.
